# Supplementary material for: Construction of a high-density linkage map and mapping of sex determination and growth-related loci in the mandarin fish (Siniperca chuatsi)
Source: PubMed Central journal article supplement (PMC5461734; doi:10.1186/s12864-017-3830-3), 2017-06-06

### **Supplemental Figure Legends**

**Supplemental Figures 1. Linkage group lengths and marker distributions of the maternal map of mandarin fish.**

**Supplemental Figures 2. Linkage group lengths and marker distributions of the paternal map of mandarin fish.**

**Supplementary Figure 3. The QTL curve trends of growth-related traits of the mandarin fish.**

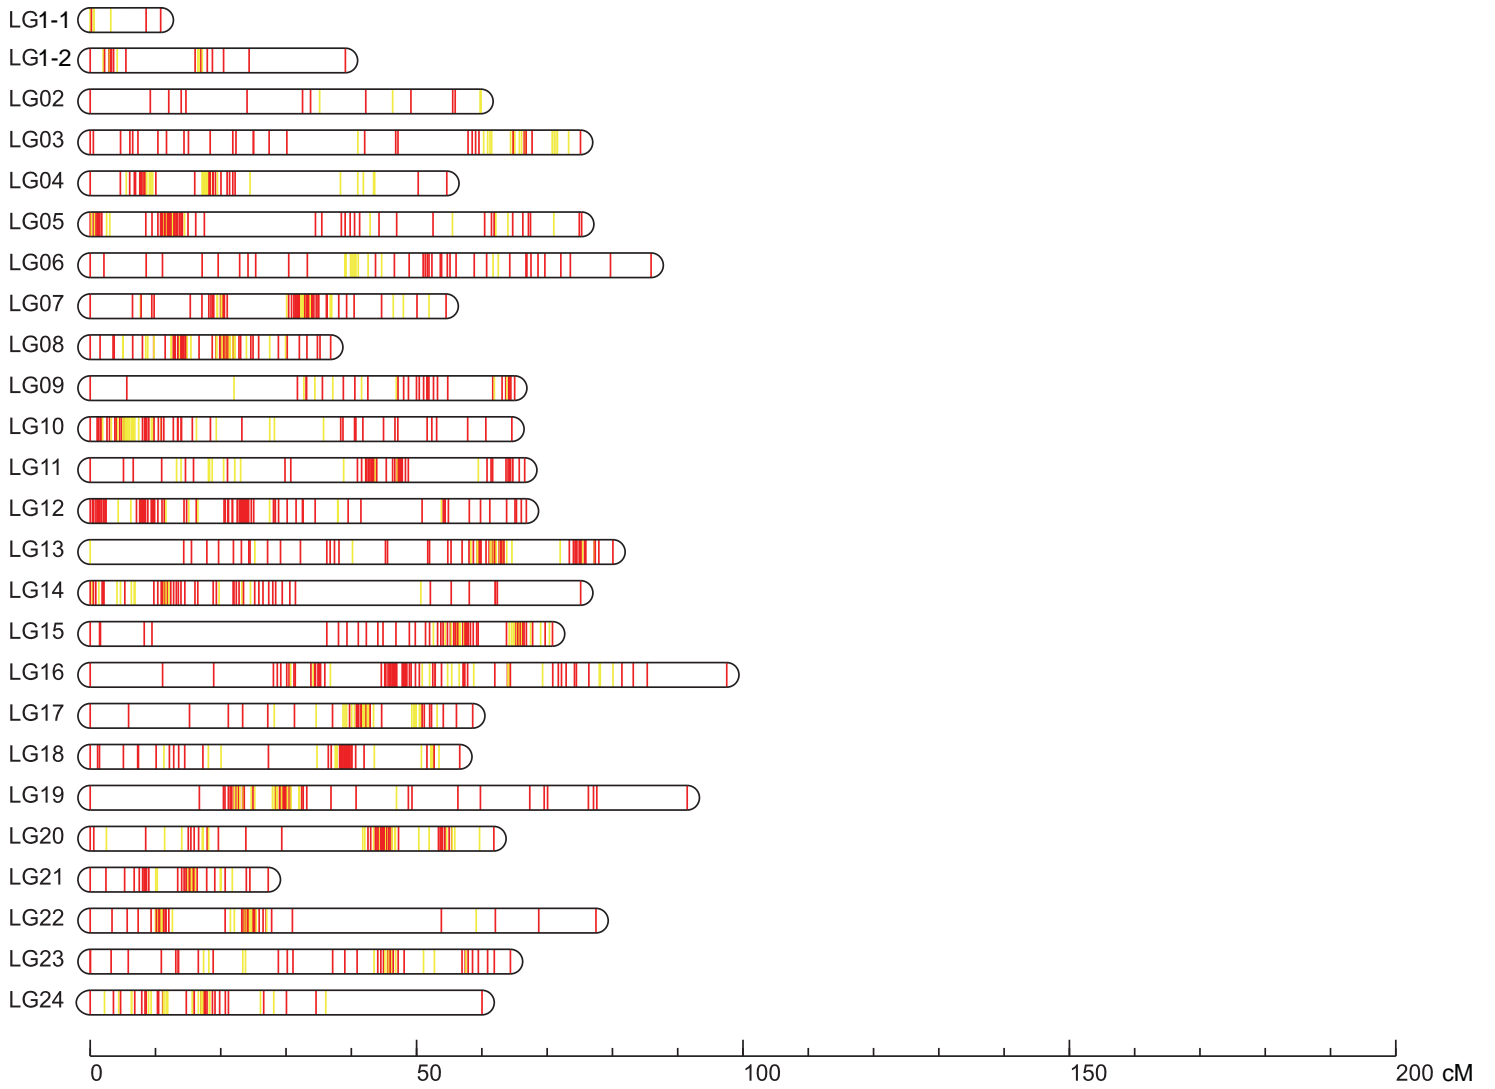

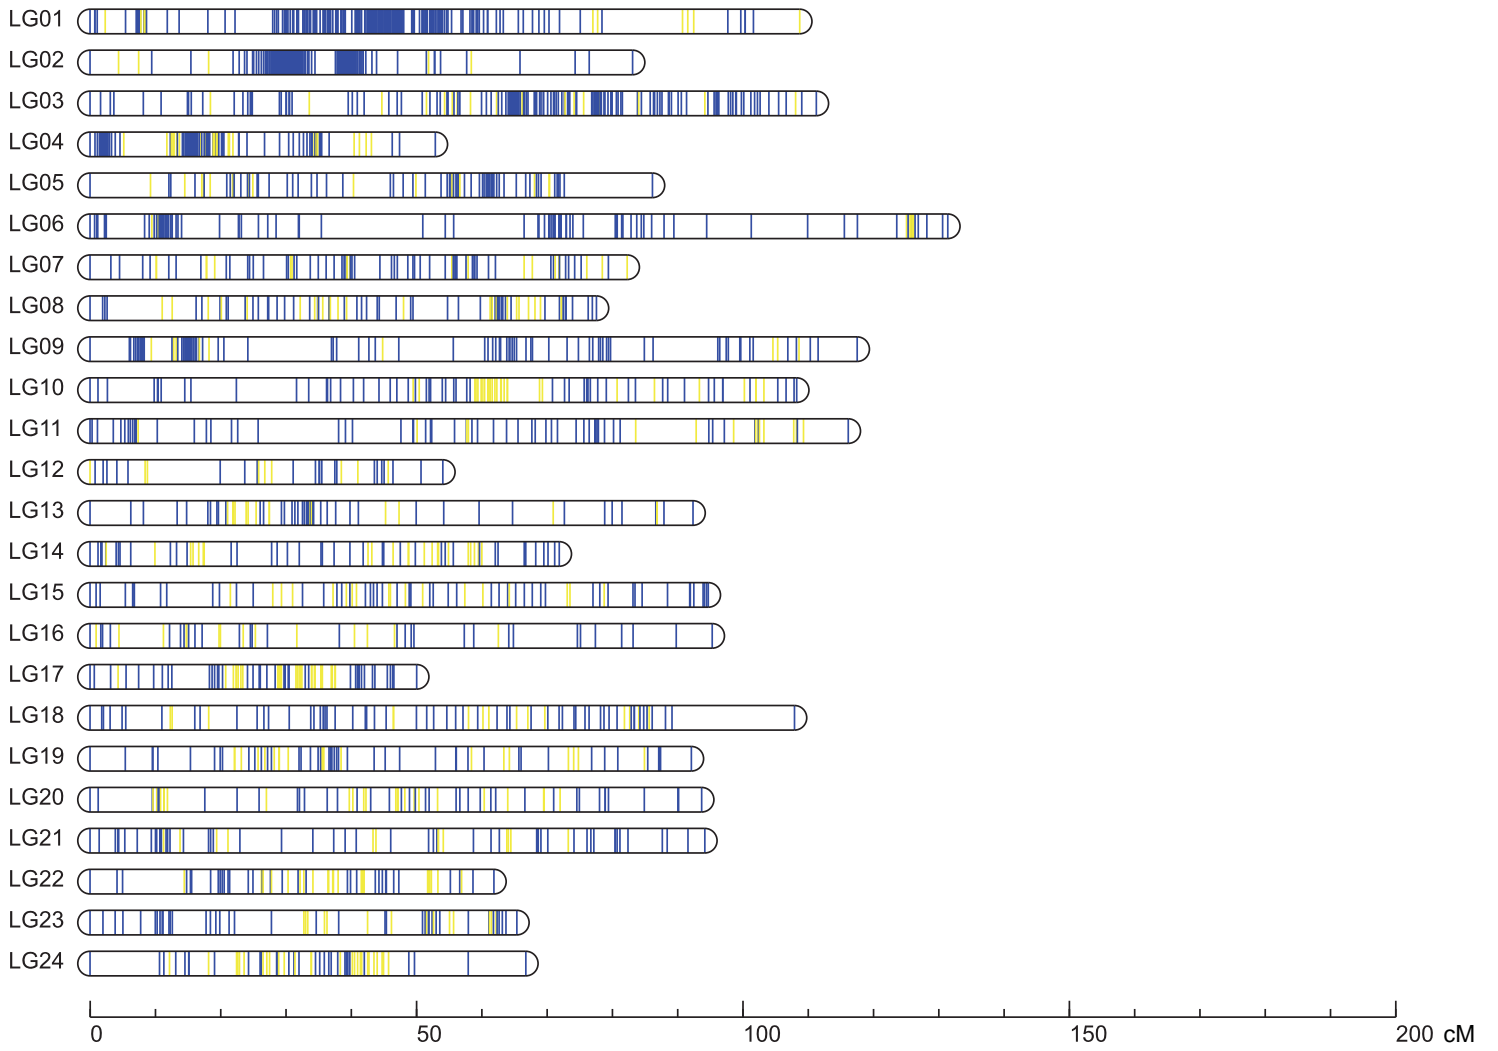

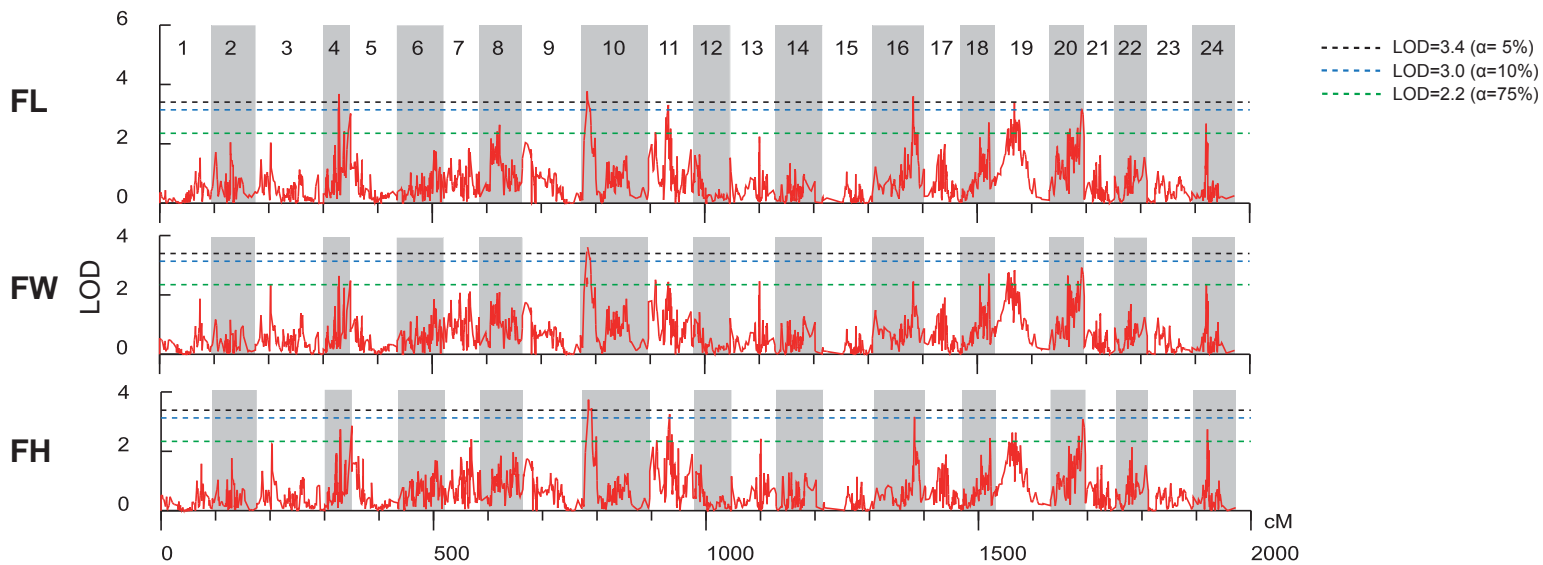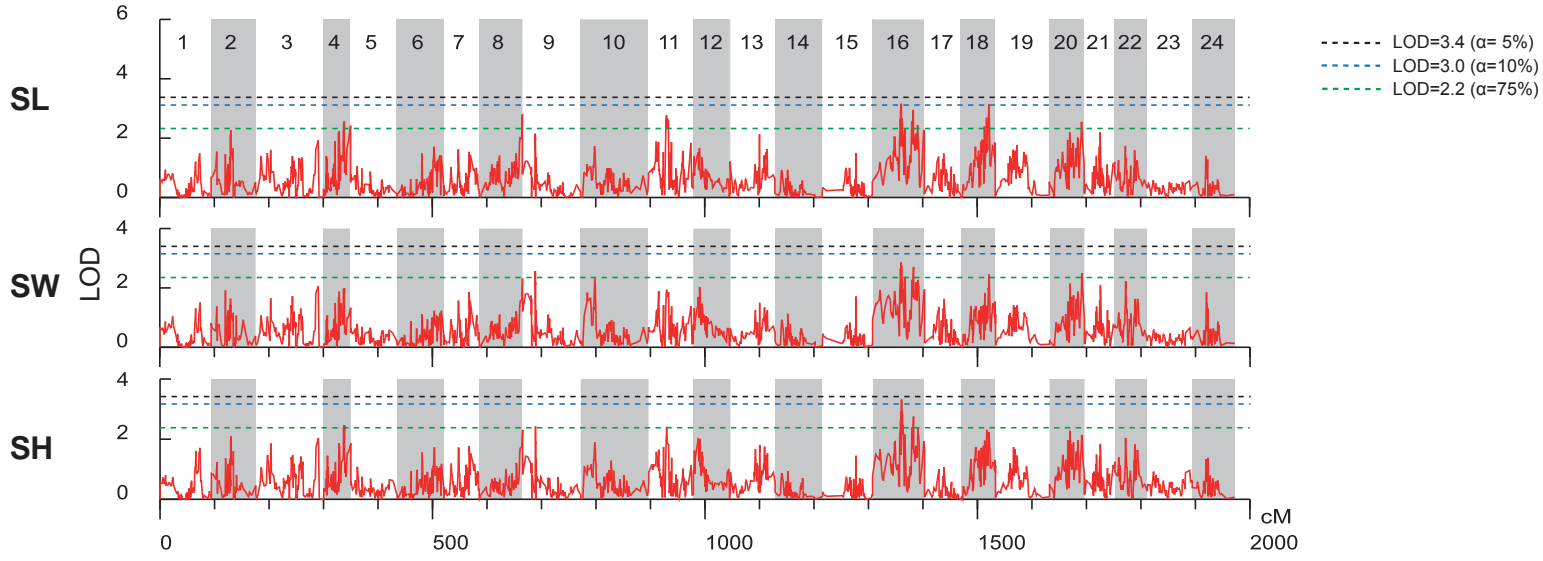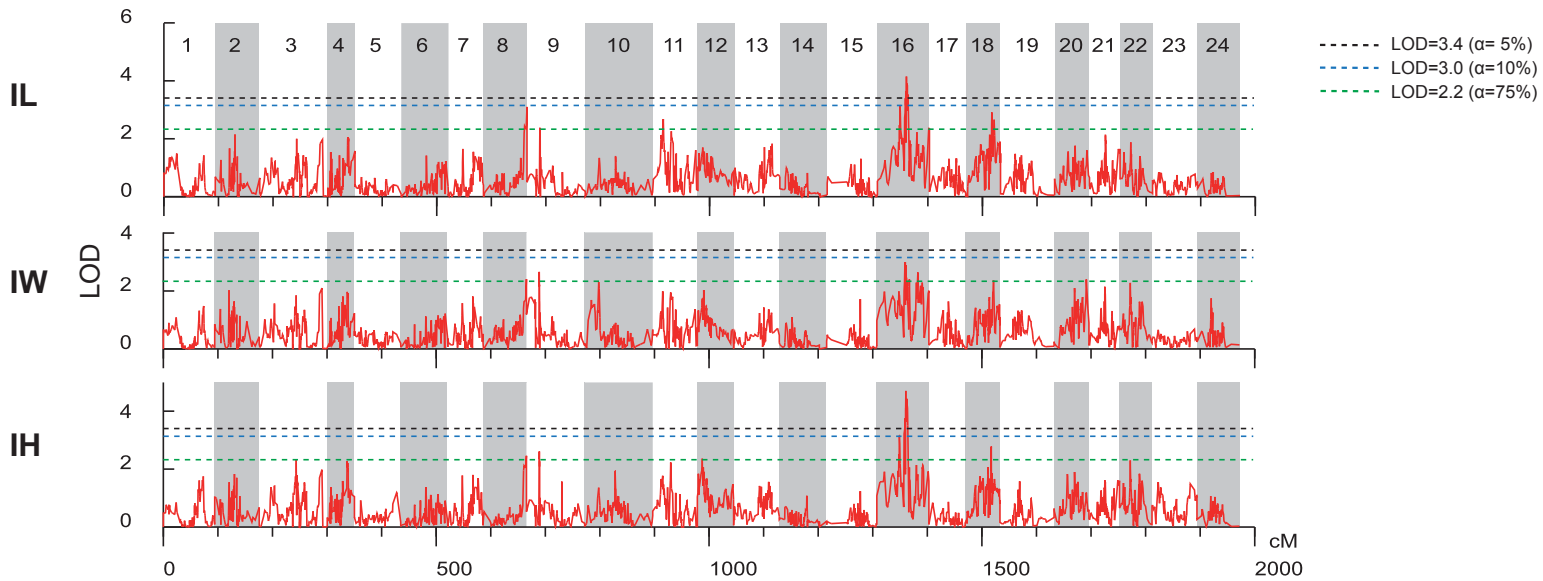

Supplement: 12864_2017_3830_MOESM5_ESM.pdf [file 12864_2017_3830_MOESM5_ESM.pdf]
